# Supplementary material
Source: publisher figshare collection journal article supplement (https://acs.figshare.com/ndownloader/files/17302346)
Supplement: Supplementary file 1 [file 17302346]

## Supporting Information

### **High Porosity in Nanostructured *n*-Type Bi<sub>2</sub>Te<sub>3</sub> Obtaining Ultralow Lattice Thermal Conductivity**

*Yuan Wang,<sup>1</sup> Wei-Di Liu,<sup>2</sup> Han Gao,<sup>2</sup> Li-Jun Wang,<sup>2</sup> Meng Li,<sup>2</sup> Xiao-Lei Shi,<sup>2</sup> Min Hong,<sup>1</sup> Hao Wang,<sup>1</sup> Jin Zou,<sup>2,3</sup> and Zhi-Gang Chen<sup>\*,1,2</sup>*

*<sup>1</sup>Centre for Future Materials, University of Southern Queensland, Springfield central, Queensland 4300, Australia.*

*<sup>2</sup>Materials Engineering, The University of Queensland, Brisbane, Queensland 4072, Australia.*

*<sup>3</sup>Centre for Microscopy and Microanalysis, The University of Queensland, Brisbane, Queensland 4072, Australia*

Corresponding author: <sup>1</sup> [zhigang.chen@usq.edu.au](mailto:zhigang.chen@usq.edu.au), <sup>2</sup> [zhigang.chen@uq.edu.au](mailto:zhigang.chen@uq.edu.au)

### 1. Magnified XRD results of as-synthesized $\text{Bi}_2\text{Te}_3$ powder and as-sintered $\text{Bi}_2\text{Te}_3$ pellet

Te vacancy can be manifested from the peak shift in our magnified XRD results in the **Fig. S1**. Specifically, Te vacancy can lead lattice shrinkage in  $\text{Bi}_2\text{Te}_3$  due to the absence of Te atoms. According to Bragg's Law, this will accordingly induce higher  $\theta$  of the XRD peaks, which is reflected from the shifted (0 0 15) peaks of both powder and pellet samples towards higher degree.

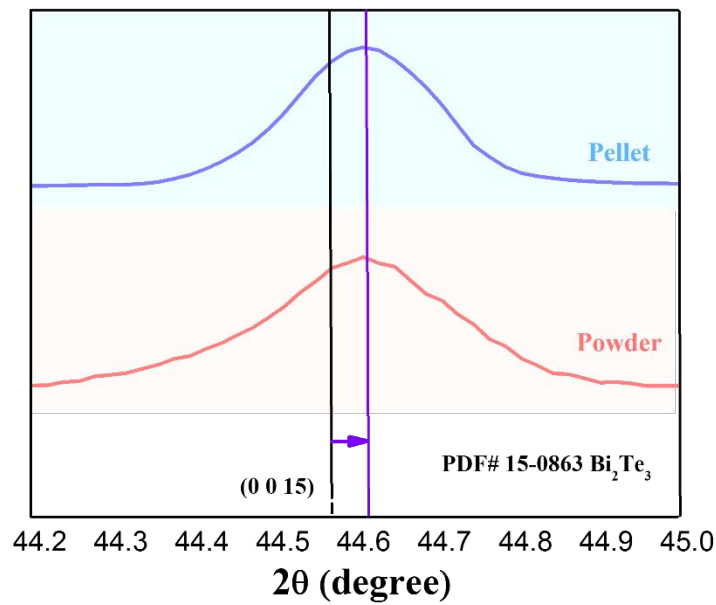

**Fig. S1.** Magnified XRD results of as-synthesized  $\text{Bi}_2\text{Te}_3$  powder and as-sintered  $\text{Bi}_2\text{Te}_3$  pellet, where peak shift towards higher degree is observed.

## 2. XPS spectra of as-synthesized Bi<sub>2</sub>Te<sub>3</sub> powder and as-sintered Bi<sub>2</sub>Te<sub>3</sub> pellet

Full X-ray spectroscopy (XPS) spectra of as-synthesized Bi<sub>2</sub>Te<sub>3</sub> nano-powder and as-sintered porous nanostructured Bi<sub>2</sub>Te<sub>3</sub> pellet are shown in **Fig. S2a** and **Fig. S2b**, respectively. The presences of Bi 4f and Te 3d energy states were exclusively determined, without any energy states detected for other elements, except C 1s and O 1s. Corresponding high-resolution XPS scans of Bi in the as-synthesized Bi<sub>2</sub>Te<sub>3</sub> nano-powder and as-sintered porous nanostructured Bi<sub>2</sub>Te<sub>3</sub> pellet are shown in **Fig. S2c** and **Fig. S2d**, respectively. No obvious difference was found after the sintering. The existence of single valence state Bi<sup>3+</sup> in both Bi<sub>2</sub>Te<sub>3</sub> nano-powder and porous nanostructured Bi<sub>2</sub>Te<sub>3</sub> pellet was verified, where peaks of Bi 4f<sub>5/2</sub> and Bi 4f<sub>7/2</sub> were detected at 162.5 eV and 157.2 eV, respectively.<sup>1</sup>

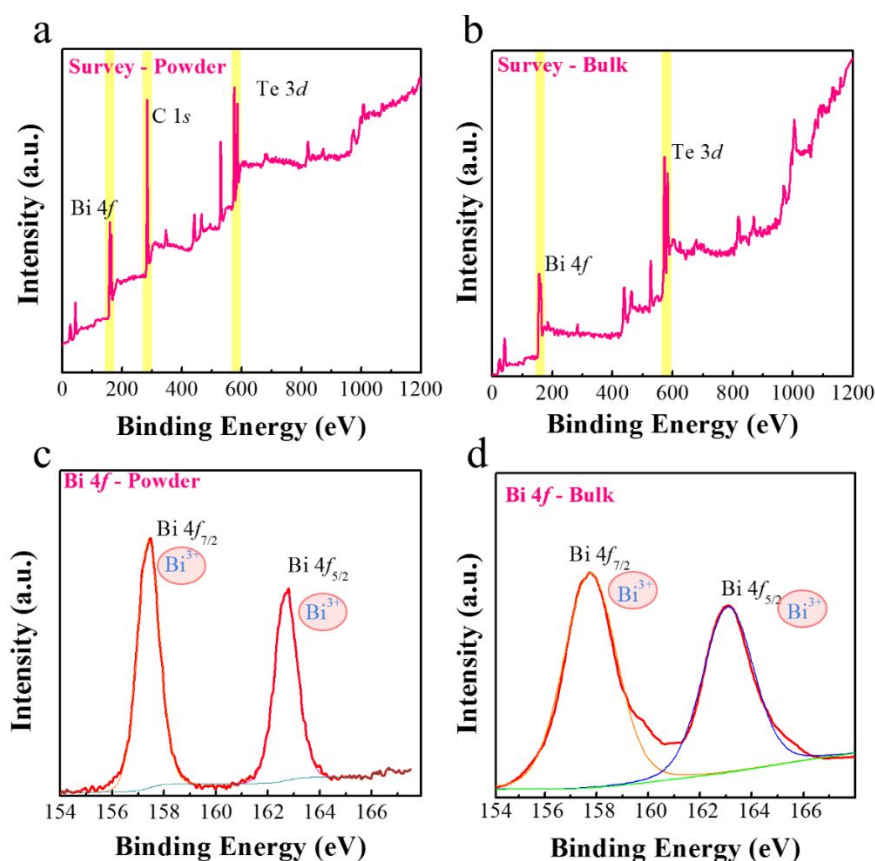

**Fig. S2.** Full XPS spectra of (a) as-synthesized Bi<sub>2</sub>Te<sub>3</sub> nano-powder and (b) as-sintered porous nanostructured Bi<sub>2</sub>Te<sub>3</sub> pellet. High-resolution XPS scans of Bi in the (c) as-synthesized Bi<sub>2</sub>Te<sub>3</sub> nano-powder and (d) as-sintered porous nanostructured Bi<sub>2</sub>Te<sub>3</sub> pellet.

### 3. Lorenz factor and measured thermal properties

**Fig. S3a** shows the SPB-calculated Lorenz factor ( $L$ ) of as-sintered porous nanostructured  $\text{Bi}_2\text{Te}_3$  pellet.  $L$  was found to be around  $1.8 \times 10^{-8} \text{ v}^2 \text{ K}^{-2}$ , with no obvious change within the temperature between 300 K and 550 K. **Fig. S3b** shows calculated electrical thermal conductivity ( $\kappa_e$ ) of as-sintered porous nanostructured  $\text{Bi}_2\text{Te}_3$  pellet. Similar values were found compared with dense nanostructured  $\text{Bi}_2\text{Te}_3$  pellet.<sup>2</sup> **Fig. S3c** shows measured thermal diffusivity ( $D$ ) of as-sintered porous nanostructured  $\text{Bi}_2\text{Te}_3$  pellet. **Fig. S3d** shows measured heat capacity ( $C_p$ ) of as-sintered porous nanostructured  $\text{Bi}_2\text{Te}_3$  pellet, which is well consistent with dense nanostructured  $\text{Bi}_2\text{Te}_3$  pellet.<sup>2</sup>

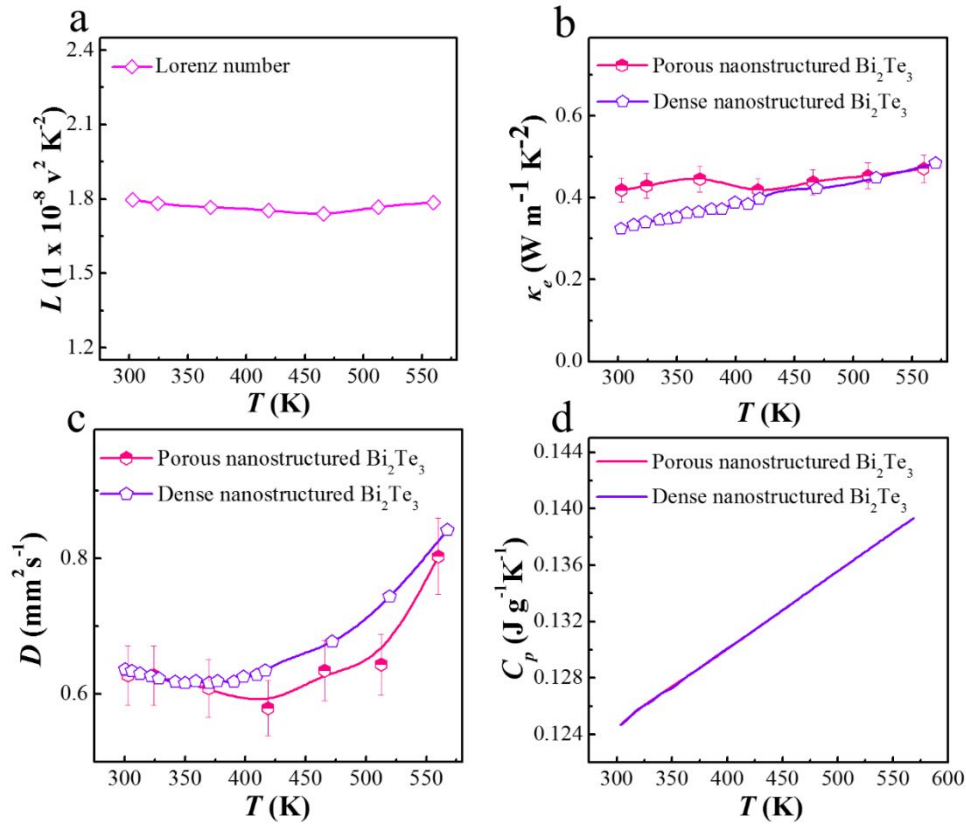

**Fig. S3.** (a) Calculated Lorenz factor with SPB model.  $T$ -dependent (b)  $\kappa_e$ ; (c)  $D$  and (d)  $C_p$  of as-sintered porous nanostructured  $\text{Bi}_2\text{Te}_3$  pellet and dense nanostructured  $\text{Bi}_2\text{Te}_3$  pellet.<sup>2</sup>

#### 4. EPMA results

**Table S1** shows detailed atomic composition of as-sintered porous nanostructured  $\text{Bi}_2\text{Te}_3$  pellet characterized by electron probe micro-analyzer (EPMA). Ten sites were randomly selected to ensure the reliability and accuracy of the pellet composition.

**Table S1.** EPMA measured atomic composition of as-sintered porous nanostructured  $\text{Bi}_2\text{Te}_3$  pellet.

| Point   | Bi (at. %) | Te (at. %) | Total (at. %) | Bi/Te    |
|---------|------------|------------|---------------|----------|
| 1       | 35.2934    | 49.3951    | 100           | 0.714512 |
| 2       | 33.1585    | 46.3125    | 100           | 0.715973 |
| 3       | 33.2491    | 47.0595    | 100           | 0.706533 |
| 4       | 37.0272    | 50.6173    | 100           | 0.731513 |
| 5       | 36.3166    | 48.8793    | 100           | 0.742985 |
| 6       | 38.8218    | 55.1961    | 100           | 0.703343 |
| 7       | 39.0351    | 55.3944    | 100           | 0.704676 |
| 8       | 39.134     | 55.0341    | 100           | 0.711086 |
| 9       | 38.4345    | 54.9078    | 100           | 0.699983 |
| 10      | 38.5582    | 53.2736    | 100           | 0.723777 |
| Average | 36.90284   | 51.60697   | 100           | 0.715438 |

## 5. SPB model calculation details

We used a single parabolic band (SPB) model<sup>3, 4</sup> to calculate the enhancement of  $n$ -dependent  $zT$  with reduced lattice thermal conductivity ( $\kappa_l$ ). For calculation details, the carrier transport property analysis was employed as:

$$S(\eta) = \frac{k_B}{e} \cdot \left[ \frac{\left(r + \frac{5}{2}\right) \cdot F_{r + \frac{3}{2}}(\eta)}{\left(r + \frac{3}{2}\right) \cdot F_{r + \frac{1}{2}}(\eta)} - \eta \right] \quad (\text{S4-1})$$

$$n = \frac{1}{e \cdot R_H} = \frac{(2m^* \cdot k_B T)^{\frac{3}{2}}}{3\pi^2 \hbar^3} \cdot \frac{\left(r + \frac{3}{2}\right)^2 \cdot F_{r + \frac{1}{2}}^2(\eta)}{\left(2r + \frac{3}{2}\right) \cdot F_{2r + \frac{1}{2}}(\eta)} \quad (\text{S4-2})$$

$$\mu = \left[ \frac{4\pi \hbar^4 C_l}{\sqrt{2}(k_B T)^{\frac{3}{2}} E_{def}^2 (m^*)^{\frac{5}{2}}} \right] \frac{\left(2r + \frac{3}{2}\right) \cdot F_{2r + \frac{1}{2}}(\eta)}{\left(r + \frac{3}{2}\right)^2 \cdot F_{r + \frac{1}{2}}(\eta)} \quad (\text{S4-3})$$

$$L = \left(\frac{k_B}{e}\right)^2 \cdot \left\{ \frac{\left(r + \frac{7}{2}\right) \cdot F_{r + \frac{5}{2}}(\eta)}{\left(r + \frac{3}{2}\right) \cdot F_{r + \frac{1}{2}}(\eta)} - \left[ \frac{\left(r + \frac{5}{2}\right) \cdot F_{r + \frac{3}{2}}(\eta)}{\left(r + \frac{3}{2}\right) \cdot F_{r + \frac{1}{2}}(\eta)} \right]^2 \right\} \quad (\text{S4-4})$$

where  $\eta$ ,  $k_B$ ,  $e$ ,  $r$ ,  $R_H$ ,  $\hbar$ ,  $C_l$ ,  $E_{def}$ , and  $L$  are the reduced Fermi level, the Boltzmann constant, the electron charge, the carrier scattering factor ( $r = -1/2$  for acoustic phonon scattering), the Hall coefficient, the reduced plank constant, the elastic constant for longitudinal vibrations, the deformation potential coefficient, and the Lorenz number, respectively. Here:

$$C_l = v_l^2 \cdot \rho \quad (\text{S4-5})$$

where  $v_l$  is the longitudinal sound velocity and taken as 2884 m s<sup>-1</sup> in this study.<sup>5</sup>  $F_i(\eta)$  is the Fermi integral expressed as:

$$F_i(\eta) = \int_0^\infty \frac{x^i}{1 + e^{(x-\eta)}} dx \quad (\text{S4-6})$$

To predict the  $zT$  enhancement with reduced  $\kappa_l$  by inducing porous structure, we assume that the pores are uniformly distributed in the Bi<sub>2</sub>Te<sub>3</sub> matrix. In this situation,  $\kappa_{lp}$  can be defined as

the  $\kappa_l$  of porous  $\text{Bi}_2\text{Te}_3$ . Here, experimentally measured  $\kappa_l$  was utilized. Phonon mean free path  $\Lambda_b$  was calculated as:<sup>6</sup>

$$\Lambda_b = \frac{3 \cdot \kappa_{lb}}{C_v v_\alpha} \quad (\text{S4-7})$$

where  $C_v$  is the volume heat capacity.  $v_\alpha$  is the average sound velocity taken as  $2147 \text{ m s}^{-1}$ .<sup>5</sup>

## 6. A comprehensive comparison of $zT$ with other state-of-art binary $n$ -type $\text{Bi}_2\text{Te}_3$ works

A comprehensive comparison with other state-of-art binary  $n$ -type  $\text{Bi}_2\text{Te}_3$  works can be found from **Fig. S4**, where the achieved  $zT$  of 0.97 in our work is listed as one of the highest values reported for binary  $n$ -type  $\text{Bi}_2\text{Te}_3$ .

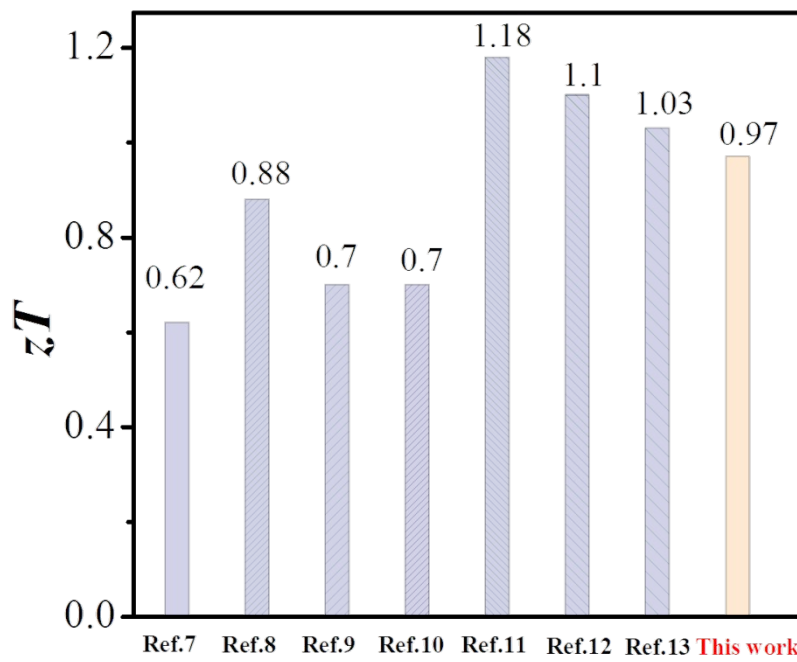

**Fig. S4.** A comprehensive comparison of  $zT$  with other state-of-art binary  $n$ -type  $\text{Bi}_2\text{Te}_3$  works.<sup>7-13</sup>



## Reference

- 1 J. Fu, S. Song, X. Zhang, F. Cao, L. Zhou, X. Li and H. Zhang, *CrystEngComm*, 2012, **14**, 2159-2165.
- 2 L. Yang, Z. G. Chen, M. Hong, G. Han and J. Zou, *ACS Appl. Mater. Interfaces*, 2015, **7**, 23694-23699.
- 3 Y. Xu, W. Li, C. Wang, J. Li, Z. Chen, S. Lin, Y. Chen and Y. Pei, *J. Mater. Chem. A*, 2017, **5**, 19143-19150.
- 4 X. She, X. Su, H. Du, T. Liang, G. Zheng, Y. Yan, R. Akram, C. Uher and X. Tang, *J. Mater. Chem. C*, 2015, **3**, 12116-12122.
- 5 M. Hong, T. C. Chasapis, Z. G. Chen, L. Yang, M. G. Kanatzidis, G. J. Snyder and J. Zou, *ACS Nano*, 2016, **10**, 4719-4727.
- 6 K. Zhao, H. Duan, N. Raghavendra, P. Qiu, Y. Zeng, W. Zhang, J. Yang, X. Shi and L. Chen, *Adv. Mater.*, 2017, **29**, 1701148.
- 7 Yang, L.; Chen, Z. G.; Hong, M.; Han, G.; Zou, J. Enhanced Thermoelectric Performance of Nanostructured Bi<sub>2</sub>Te<sub>3</sub> through Significant Phonon Scattering. *ACS Appl. Mater. Interfaces* **2015**, *7*, 23694-23699.
- 8 Zhang, Y.; Day, T.; Snedaker, M. L.; Wang, H.; Kramer, S.; Birkel, C. S.; Ji, X.; Liu, D.; Snyder, G. J.; Stucky, G. D. A mesoporous anisotropic *n*-type Bi<sub>2</sub>Te<sub>3</sub> monolith with low thermal conductivity as an efficient thermoelectric material. *Adv. Mater.* **2012**, *24*, 5065-5070.
- 9 Fu, J.; Song, S.; Zhang, X.; Cao, F.; Zhou, L.; Li, X.; Zhang, H. Bi<sub>2</sub>Te<sub>3</sub> Nanoplates and Nanoflowers: Synthesized by Hydrothermal Process and their Enhanced Thermoelectric Properties. *CrystEngComm* **2012**, *14*, 2159-2165.

- 10 Yu, F.; Xu, B.; Zhang, J.; Yu, D.; He, J.; Liu, Z.; Tian, Y. Structural and thermoelectric characterizations of high pressure sintered nanocrystalline Bi<sub>2</sub>Te<sub>3</sub> bulks. *Mater. Res. Bull* **2012**, *47*, 1432-1437.
- 11 Son, J. S.; Choi, M. K.; Han, M. K.; Park, K.; Kim, J. Y.; Lim, S. J.; Oh, M.; Kuk, Y.; Park, C.; Kim, S. J.; Hyeon, T. *n*-Type Nanostructured Thermoelectric Materials Prepared from Chemically Synthesized Ultrathin Bi<sub>2</sub>Te<sub>3</sub> Nanoplates. *Nano Lett.* **2012**, *12*, 640-647.
- 12 Mehta, R. J.; Zhang, Y.; Karthik, C.; Singh, B.; Siegel, R. W.; Borca-Tasciuc, T.; Ramanath, G. A new class of doped nanobulk high-figure-of-merit thermoelectrics by scalable bottom-up assembly. *Nat. Mater.* **2012**, *11*, 233-240.
- 13 Zhao, L. D.; Zhang, B. P.; Li, J. F.; Zhang, H. L.; Liu, W. S. Enhanced thermoelectric and mechanical properties in textured *n*-type Bi<sub>2</sub>Te<sub>3</sub> prepared by spark plasma sintering. *Solid State Sci.* **2008**, *10*, 651-658.
